# Supplementary material
Source: HighWire-hosted journal article supplement (https://fg.bmj.com/content/14/3/236)
Supplement: inline-supplementary-material-1 [file inline-supplementary-material-1.pdf]

## APPENDIX

### BSG SWiG Survey on Impact of COVID-19 Recovery on Workforce, Workload and Wellbeing

Please kindly complete this anonymous survey which takes less than 10 minutes to complete.

---

#### Clinical role

1. Region: (Scotland / Wales / Northern Ireland / East Midlands / East of England / Kent, Sussex and Surrey / London / North East England / North West England / South West England – Peninsula / South West England – Severn / Thames Valley / Wessex / West Midlands / Yorkshire & the Humber / Northern Ireland / Scotland / Wales)
2. Role: (SAS/ Consultant gastroenterologist or hepatologist < 5 years / Consultant gastroenterologist or hepatologist within 5 years of retirement / Consultant gastroenterologist or hepatologist established in post / Trainee)
3. Job plan:
  - a. If you are a consultant, what are the no. of PAs in your job plan (<10, 10-12, >12, n/a)
  - b. If you are not a consultant, do you work less than full time (LTFT)? (Yes, No, n/a)
4. Do you have a subspecialty interest? (Advanced endoscopy, IBD, Hepatology, Nutrition, HPB, neurogastroenterology, UGI)
5. Does your work pattern include general (internal) medicine on-call? (Yes/No)

---

#### Equality and inclusion demographics (anonymous)

6. What gender do you identify with? (Male / Female / Non-binary / prefer not to say)
7. What is your ethnicity? [White (British, Irish, Gypsy or Irish Traveller, any other white background) / Any mixed or multiple ethnic groups / Asian or Asian British (Indian, Pakistani, Bangladeshi, Chinese, any other Asian background) / Black African or Caribbean or Black British (African / Caribbean / any other Black, African or Caribbean background) / Arab or Arab British / Any other ethnic group]
8. Do you have a visible or invisible disability? (Yes / No / prefer not to say)
9. What is your age? (25 - 34, 35 - 44, 45 - 55, 55 - 65, 65+ years)

---

#### Impact of COVID on personal circumstances

10. Have you specifically taken time off work during the COVID pandemic due to caring or home schooling responsibilities?  
(Yes, and work have accommodated / Yes, and work have NOT accommodated / No)
11. Did you shield due to personal risk or to protect a household member or other caring responsibilities?

(No / Yes, due to personal risk and my work accommodated / Yes, due to personal risk and my work did NOT accommodate / Yes, due to household member at risk and my work accommodated / Yes, due to household member at risk and my work did NOT accommodate / Yes, due to other caring responsibilities and my work accommodated / Yes, due to other caring responsibilities and my work did NOT accommodate)

12. Did you personally have COVID in the past year, and if so, did you feel under pressure to return to work before you felt ready? (Yes I did and I did feel pressure to return to work before ready / Yes I did and I did NOT feel pressure to return to work before ready / No I did not have COVID)

13. How long did it take for you to feel back to your pre-COVID illness level of health?

- a. Physical health including fatigue levels (<2, 2-4, 4-8, 8 weeks, >12 weeks, not applicable)
- b. Mood and stress/anxiety levels (<2, 2-4, 4-8, 8 weeks, >12 weeks, not applicable)

---

### Remote and flexible working patterns

14. Number of PAs/working hours regularly worked beyond agreed pay per week

- a. Pre-COVID: [free text] PA / hours per week
- b. Now: [free text] PA/ hours per week
- c. Have you had a regular increase in your working pattern out-of-hours? (e.g. due to other colleagues needing to shield) (Yes/No)
- d. Please elaborate on reasons for any change in working hours (free text)

15. Have you had access to flexible working patterns during the pandemic? (Yes, increased opportunity since pandemic / Yes, but unchanged from pre-pandemic time period / No)

16. In the aftermath of the pandemic, do you plan to change your working patterns from your pre-COVID working patterns? (Yes, more flexible working hours / Yes, am considering early retirement / No)

17. Do you feel more isolated from your department since the onset of more remote working? (Yes / No, I have enough contact with other members of the department remotely or face-to-face / Other, comment [free text])

18. Reduced patient face to face contact during the pandemic made your job... (more fulfilling / less fulfilling / the same)

19. Early retirement:

- a. Has the pandemic made you retire or consider retiring earlier than planned? (Yes/No)
- b. Have you reduced clinical commitments due to personal risk from COVID (Yes/No)

20. On a scale of 1 – 10 how anxious are you about your department's ability to provide adequate services in the advent of catching up with the backlog associated with COVID? (Likert scale 1 to 10 where 1 is 'not anxious at all' and 10 is 'highly anxious')

21. Do you think we have adequate workforce (this includes doctors, nurses and allied health care professionals) to meet the demands associated with this backlog? (Yes / No / I think that there is potential to increase the workforce in the medium term)
22. Have you accessed or been made aware of any resources to support your wellbeing, either at your own Trust or part of a national society? [free text]
23. Any comments on how wellbeing and burnout concerns can be addressed by the BSG? [free text]
